1 **Life-stage and sex influence *Philornis* ectoparasitism in a Neotropical woodpecker (*Melanerpes***  
2 ***striatus*) with essential male parental care**

3 Running title: *Philornis* on Hispaniolan Woodpeckers

4

5 Joshua B. LaPergola <sup>1,2</sup>

6 <sup>1</sup> Department of Neurobiology and Behavior, Cornell University, Ithaca, NY; Bird Population Studies  
7 program, Cornell Lab of Ornithology, Ithaca, NY, USA

8 <sup>2</sup> Department of Ecology and Evolutionary Biology, Princeton University, Princeton, NJ, USA

9 Corresponding author: jll101@princeton.edu; jlapblca@gmail.com

10 <https://orcid.org/0000-0002-2575-0751>

11

12 **Conflict of interest.** The author declares that he has no conflicts of interest.

13 **Ethics approval.** All research activities described here were approved by the Dominican Republic's  
14 Ministerio de Medio Ambiente y Recursos Naturales and conducted in accordance with IACUC protocol  
15 2008-0185 at Cornell University.

16 **Availability of data and material.** The data that support the findings of this study will be openly  
17 available in the repository OSF.IO upon acceptance of the manuscript. I provide a temporary link  
18 ([https://osf.io/unksw/?view\\_only=4e1cae68cc294fd59a5906a52ee79767](https://osf.io/unksw/?view_only=4e1cae68cc294fd59a5906a52ee79767)) so that editors and reviewers  
19 can review the dataset for my manuscript. I will create a publicly registered version of this, including a  
20 permanent link and DOI, once the manuscript is accepted.

21 **Acknowledgments**

22 I gratefully acknowledge the following individuals for providing invaluable assistance in the field:

23 Michelle Angelucci, Haley Boyle, Cecilia Cerrilla, Will Coleman, Aracely Diaz, Lauren Emerson, Neil

24 Gilbert, Amy Janik, Kiera Kauffman, Thomas Lacerda, Alex Lascher-Posner, Mia Larrieu, Kai Larsen,

25 Cedar Mathers-Winn, Kaylee Nelsen, Alyssa Occhialini, Spencer Schubert, Hannah Stapleton, Mitch

26 Walters, Alexa Waterman-Snow, Paris Werner, and Amber Wichtendahl. I thank Walter D. Koenig, Janis

27 L. Dickinson, Paul W. Sherman, Michael S. Webster, H. Kern Reeve, and Irby J. Lovette for providing  
28 constructive criticism at various points in the development of the main project that ultimately led to this  
29 separate analysis. Breanna L. Bennett, Trey C. Hendrix, Severine B. Hex, Christie Riehl, Amanda G.  
30 Savagian, Maria G. Smith, and Alec E. Downie provided much appreciated constructive feedback and  
31 discussions that greatly improved the manuscript. I also thank F. Ishtiaq and two anonymous reviewers  
32 for their helpful comments on the manuscript. Martín A. Quiroga, Holly M. Garrod, Letícia Soares, and  
33 Steven C. Latta provided much appreciated insight into their observations of *Philornis*. I owe much  
34 gratitude to Robert Ortíz and the staff at Museo Nacional de Historia Natural in Santo Domingo for  
35 assistance with local permitting. The following sources provided funding support: American  
36 Ornithological Society Wetmore Award, Cornell Lab of Ornithology Athena Fund, Department of  
37 Neurobiology Animal Behavior Research Grant, Society for the Study of Evolution Rosemary Grant  
38 Award, and Sigma Xi Grant in Aid of Research. The following fellowships supported me during  
39 fieldwork: Charles Walcott Graduate Fellowship, Linda and Samuel Kramer Graduate Student  
40 Fellowship, Eleanore Stuart Graduate Fellowship, Andrew '78 and Margaret Paul Graduate Fellowship,  
41 Kramer Graduate Fellowship, Halberstadt Graduate Fellowship, Anne Marie Brown Summer Graduate  
42 Fellowship, and Lab of Ornithology Summer Graduate Fellowship.

43 **Life-stage and sex influence *Philornis* ectoparasitism in a Neotropical woodpecker (*Melanerpes***  
44 ***striatus*) with essential male parental care**

45

46 **Abstract**

47 The nestlings of many Neotropical bird species suffer from *Philornis* (Diptera: Muscidae) ectoparasitism.  
48 While nestlings are typically considered the intended targets, recent work indicates that *Philornis* infest  
49 adult birds more frequently than previously appreciated, yet few studies have concurrently surveyed  
50 nestlings and adults for *Philornis* in the same population. Over six field seasons (2012–2017), I  
51 documented the presence of current or recent subcutaneous *Philornis* infestations on adult and nestling  
52 Hispaniolan Woodpeckers *Melanerpes striatus* from the same population. I tested the following three  
53 non-mutually exclusive hypotheses regarding occurrence of *Philornis* on adult birds: (1) nestlings are  
54 more vulnerable to *Philornis* parasitism than adults, (2) nesting is associated with *Philornis* parasitism in  
55 adults, and (3) *Philornis* parasitism is associated with incubation and brooding investment. While nestling  
56 and adult woodpeckers exhibited similar prevalence of parasitism, parasitized nestlings hosted on average  
57 3.5 times more *Philornis* wounds (larvae plus empty wounds) than parasitized adults. Nesting *per se* was  
58 not significantly associated with parasitism among adults, as breeding and non-breeding adults showed  
59 similar prevalence and intensity. However, adult males, which perform overnight incubation and  
60 brooding, were significantly more likely to be parasitized than adult females. This last result supports the  
61 hypothesis that incubation and brooding investment increase the risk of *Philornis* parasitism for adults,  
62 but this conclusion is complicated by the lack of an association between parasitism and nesting status.  
63 Together, these results raise questions about the degree of host life-stage specialization and whether adult  
64 parasitism is incidental or part of an alternative parasitic strategy for *Philornis*.

65

66 **Resumen.** Los pichones de muchas especies de aves Neotropicales sufren de ectoparasitismo por  
67 *Philornis* (Diptera: Muscidae). Mientras que los pichones se consideran típicamente los objetivos  
68 previstos, trabajos recientes indican que *Philornis* infestan aves adultas con más frecuencia de lo que se

69 pensaba anteriormente, sin embargo, pocos estudios han examinado simultáneamente pichones y adultos  
70 para *Philornis* en la misma población. Durante seis temporadas de campo (2012–2017), documenté la  
71 presencia de infestaciones subcutáneas recientes o actuales de *Philornis* en adultos y pichones de la  
72 misma población del pájaro carpintero *Melanerpes striatus*. Probé las siguientes tres hipótesis no  
73 mutuamente excluyentes con respecto a la aparición de *Philornis* en aves adultas: (1) los pichones son  
74 más vulnerables al parasitismo de *Philornis* que los adultos, (2) la anidación está asociada con el  
75 parasitismo de *Philornis* en adultos, y (3) el parasitismo de *Philornis* es asociado con la incubación y la  
76 inversión de crianza. Mientras que los pichones y los adultos exhibieron una prevalencia similar de  
77 parasitismo, los pichones parasitados hospedaron en promedio 3.5 veces más heridas de *Philornis* (larvas  
78 más heridas vacías) que los adultos parasitados. La nidificación per se no se asoció significativamente con  
79 el parasitismo entre los adultos, ya que los adultos reproductores y no reproductores mostraron una  
80 prevalencia e intensidad similares. Sin embargo, los machos adultos, que realizan incubación y  
81 empollando durante la noche, tenían una probabilidad significativamente mayor de ser parasitados que las  
82 hembras adultas. Este último resultado apoya la hipótesis de que la inversión de incubación y de  
83 empollando aumentan el riesgo de parasitismo por *Philornis* en adultos, pero esta conclusión se complica  
84 por la falta de una asociación entre el parasitismo y el estado de anidación. Juntos, estos resultados  
85 plantean preguntas sobre el grado de especialización de la etapa de vida del hospedador y si el parasitismo  
86 de adultos es incidental o parte de una estrategia parasitaria alternativa para *Philornis*.

87

## 88 **Keywords**

89 Botflies, Adult birds, Myiasis, Caribbean, Dominican Republic, Picidae

## 90 INTRODUCTION

91 Nestlings of many bird species suffer from myiasis, “the infestation of healthy or necrotic tissue...by  
92 dipteran larvae” (Little 2009 p. 546:546), and in the Neotropics, *Philornis* (Diptera: Muscidae) botflies  
93 are the primary cause of healthy tissue myiasis (Teixeira 1999, Dudaniec & Kleindorfer 2006). The larvae  
94 of at least 23 *Philornis* species are subcutaneous, blood-feeding parasites (Common *et al.* 2019). Botfly  
95 effects on nestlings can be severe (reviewed in Dudaniec & Kleindorfer 2006), in some cases reducing  
96 survival (Delanoy & Cruz 1991, Rabuffetti & Reboresda 2007, Hayes *et al.* 2019). Indeed, native and  
97 introduced *Philornis* have been implicated in the decline of several island endemic birds, most notably in  
98 the Galápagos where introduced *P. downsi* have impacted many endemic species (Fessl *et al.* 2006,  
99 Kleindorfer & Dudaniec 2016, Leuba *et al.* 2020). Yet the extent of *Philornis* infestation’s ecological  
100 impacts remains poorly known, especially in these botflies’ native ranges. Addressing these gaps will be  
101 important for not only advancing basic ornithology but also for understanding whether to account for and  
102 how to control *Philornis* in conservation and management efforts.

103         One aspect of *Philornis* parasitism that requires deeper exploration is the degree of host life stage  
104 specialization. The prevailing wisdom has been that *Philornis* target altricial and semi-altricial nestlings  
105 while the occasional observations of larvae on adult birds represent opportunistic or misdirected  
106 infestation (Teixeira 1999). Some researchers have even posited that *Philornis* cannot successfully pupate  
107 once host birds have fledged (Arendt 1985a). Understanding the degree to which *Philornis* parasitizes  
108 nestlings and adults has important ramifications for bird populations since nestling parasitism directly  
109 impacts reproductive success while adult parasitism could impact survival and reproductive success. In a  
110 recent review of published records and analysis of new data from adult capture records from three  
111 Caribbean islands, Quiroga *et al.* (2020) reported adult parasitism for 15 bird species representing 12  
112 families and four orders. While these results indicate that adult parasitism by *Philornis* might be more  
113 than opportunistic, much remains unknown, and more precise estimates of adult infestation prevalence are  
114 needed to clarify this relationship.

115         My objective here is to expand on the findings of Quiroga *et al.* (2020) by utilizing a species

116 well-suited for investigating *Philornis* parasitism: the Hispaniolan Woodpecker *Melanerpes striatus*. This  
117 woodpecker is one of the most abundant birds on Hispaniola, common from sea-level to 2,400 m asl in a  
118 wide range of habitats (Latta *et al.* 2006), providing ample sampling opportunities. Additionally, the first  
119 *Philornis* species (*P. pici*, reported as *Aricia pici*) was described from a subcutaneous larva collected from  
120 an adult Hispaniolan Woodpecker (Macquart 1853). Despite the Hispaniolan Woodpecker's high  
121 abundance, Quiroga *et al.* (2020) reported only two new records of *Philornis* infestation on adults: one  
122 each from the Cordillera Central (prevalence = 20%,  $N = 5$  individuals; H.M. Garrod pers. comm.) and  
123 Punta Cana (prevalence = 7%,  $N = 14$  individuals; L. Soares and S.C. Latta pers. comm.). Furthermore,  
124 the parasite negatively impacts the reproductive success of at least one other Hispaniolan endemic, the  
125 critically endangered Ridgway's Hawk *Buteo ridgwayi* (Hayes *et al.* 2019). Yet the woodpecker's  
126 continued abundance in spite of *Philornis* and anthropogenic pressures (Mitchell & Bruggers 1985)  
127 suggests it could be an excellent model system to advance *Philornis* biology. To that end, I test three  
128 hypotheses (Table 1) regarding *Philornis* infestation prevalence and intensity on adult birds.

129 First, I test two predictions of the hypothesis (H1) that nestlings are more vulnerable than adults  
130 to *Philornis* parasitism (Teixeira 1999). This hypothesis predicts that (P1.1) *Philornis* prevalence (the  
131 proportion of birds infested) should be higher for nestlings than for adults. Assuming nestlings are easier  
132 targets for infestation, this hypothesis also predicts (P1.2) that nestlings should have higher intensity  
133 (number of larvae per infested individual) *Philornis* infestations compared with adult birds. Due to their  
134 mobility, adult woodpeckers should provide not only fewer opportunities for larval deposition by adult  
135 flies across adults, but also fewer opportunities for repeat deposition on individual adults.

136 Second, I test two predictions of the hypothesis (H2) that nesting behavior itself is associated with  
137 *Philornis* parasitism of adults. If *Philornis* is more prevalent and intense on nestlings than adults (Arendt  
138 1985a), parasitism of adults might be an opportunistic direct result of nesting activity. This hypothesis  
139 thus predicts that *Philornis* (P2.1) prevalence and (P2.2) intensity should be higher for nesting birds than  
140 birds not nesting.

141 Lastly, I test four predictions of the hypothesis (H3a,b) that adult *Philornis* parasitism is

142 associated with incubation and brooding investment (Teixeira 1999). While nesting itself might increase  
143 exposure to *Philornis*, intersexual differences in breeding behavior might result in females and males  
144 experiencing different levels of parasitism. Both female and male Hispaniolan Woodpeckers develop  
145 brood patches and share approximately equivalent diurnal incubation and brooding (unpubl. data). If  
146 incubation and brooding behavior increase exposure (H3a), *Philornis* (P3.1a) prevalence and (P3.2a)  
147 intensity should be similar in female and male Hispaniolan Woodpeckers. Like most woodpecker species  
148 (Winkler *et al.* 1995), though, male Hispaniolan Woodpeckers perform all overnight incubation of eggs  
149 and brooding of nestlings (pers. obs.), a form of essential parental care. This male-biased nocturnal  
150 incubation and brooding behavior might be important because adults of at least some *Philornis* species  
151 will visit nests at night (O'Connor *et al.* 2010) and in the late afternoon and dusk (Pike *et al.* 2021). If  
152 overnight incubation and brooding increase exposure (H3b), *Philornis* (P3.1b) prevalence and (P3.2b)  
153 intensity should be higher for nesting males than nesting females.

154 Tests of these hypotheses and predictions (Table 1), which require data from both nestlings and  
155 adults from the same population, have only been reported for the Caribbean endemic Pearly-eyed  
156 Thrasher *Margarops fuscatus*. Both Pearly-eyed Thrashers and Hispaniolan Woodpeckers nest in cavities,  
157 a life-history trait that could impact parasitism exposure (Nilsson 1986), so one might predict similar  
158 patterns of *Philornis* prevalence and intensity in both species. In support of H1, nestling Pearly-eyed  
159 Thrashers exhibited a far higher prevalence (96%) and intensity (mean = 37 larvae/nestling) of *P.*  
160 *deceptivus* compared with adult prevalence (31%) and intensity (mean = 3.1 larvae/adult) on Puerto Rico  
161 (Arendt 1985a). To the best of my knowledge, H2 has not been directly tested in Pearly-eyed Thrashers  
162 and has only indirect support from immunological data in the Galápagos endemic Medium Ground Finch  
163 *Geospiza fortis*, which showed higher *Philornis*-specific antibody levels during nesting than pre-nesting  
164 (Huber *et al.* 2010). Pearly-eyed Thrasher data support H3a since *Philornis* prevalence among nesting  
165 females, which perform all incubation and brooding, was ~3.5 times higher than for nesting males  
166 (Arendt 1985a). Indirect evidence supporting H3a was also found in the medium ground finch: nesting  
167 females, who brood nestlings, had higher *Philornis*-specific antibody levels than nesting males (Huber *et*

168 *al.* 2010). However, no studies have investigated *Philornis* in a species where males perform essential  
169 incubation and brooding.

170

## 171 **METHODS**

172 **Field methods.** I studied Hispaniolan Woodpeckers in the community of Piedra Blanca, 3 km east of  
173 Jarabacoa (19.1193°N, 70.5819°W; 550–700 m asl), La Vega, Dominican Republic, between April 2012  
174 and July 2017. The site (~84 ha) comprised several private properties on a landscape of pine (*Pinus*  
175 *occidentalis* and *P. caribaea*) and broadleaf wet forest fragments immersed in a matrix of cattle pastures  
176 with isolated or clustered royal palms *Roystonea hispaniolana*, small fragments of secondary vegetation,  
177 and “living tree” (predominantly *Gliricidia sepium*) fences. This region experiences a mild, dry winter  
178 (January–March), followed by a short wet spring season (April–May), a long, dry summer season (June -  
179 September), and a short, wet fall season (October–December) coinciding with the latter half of the  
180 Atlantic hurricane season (Climate-data.org 2021). For the remainder of the Methods, I use “we” in lieu  
181 of “I” to describe most activities because they involved a team of tireless volunteer field assistants.

182 We evaluated *Philornis* infestation status on nestling and adult woodpeckers at trees monitored  
183 for nesting activity, which we selected based on the presence of cavities and nesting activity (e.g., cavity  
184 excavation, adults entering/exiting cavities, etc.). To determine nesting activity, we inspected cavities  
185 using a penlight and small inspection mirror (1–2” diameter) while climbing or with a wireless camera  
186 attached to a 15.2 m telescoping pole that broadcasted images to a portable digital television (Huebner &  
187 Hurteau 2007, Waldstein 2012). Once we detected a nesting attempt (i.e.,  $\geq 1$  eggs), we typically checked  
188 the clutch every 3–5 days and, when possible, daily if we did not know the clutch completion date.  
189 Incubation typically lasted 11 days (range = 9–14 days). The nestling sampling protocol differed slightly  
190 in timing across years, but in general, sampling involved collecting morphometric measurements and  
191 inspecting the entire body surface for the presence/absence of *Philornis*, including counting the number of  
192 active and empty wounds (Fig. 1). We considered a wound active if it contained  $\geq 1$  subcutaneous  
193 *Philornis* larvae, and, in cases where  $\geq 2$  larvae inhabited the same wound (see Fig. 1a for example of two



194 sets of posterior spiracles of larvae visible in a single wound), we recorded the total number of detectable  
195 larvae. Empty *Philornis* wounds resembled active wounds in appearance, except that empty wounds  
196 tended to look less swollen (Fig. 1b), lacked detectable larvae, and retained an opening where a larva had  
197 resided. For all years when we did not know the nest's hatch date (e.g., nest was found with nestlings), we  
198 sampled and banded nestlings as soon as they were large enough to carry four bands—two colour bands  
199 on one leg and one colour band and one metal band on the other leg. For nests with known hatch dates  
200 from 2013–2015, we sampled and fully banded nestlings when they were ~14 days old and resampled at  
201 ~21 days old. For nests with known hatch dates in 2016 and 2017, we sampled and metal banded  
202 nestlings at ~7 days old, resampled at ~14 days old, and resampled and added three colour bands at ~21  
203 days old.

204 For adult sampling, we captured birds via two approaches: (1) ambushing adults in nest cavities  
205 and (2) an elevated, dual-tower mist-net system (LaPergola & Kenyon in prep.). Ambushing involved  
206 setting up ambush traps as in Stanback and Koenig (1994) to allow pre-dawn capture of roosting birds.  
207 See Garrod and LaPergola (2018) for more details on implementation. To reduce nest abandonment, we  
208 used the ambush method  $\geq 7$  days before egg-laying or  $\geq 22$  days post-hatch. The mist-net tower system  
209 involved erecting two 15.2 m tower poles supported with guy lines (ropes) and, using pulleys and ropes,  
210 raising two stacked 12 m mist-nets in front of nesting trees. This method reduced disturbance at nests,  
211 enabled capture of woodpeckers using trees too unstable to climb, increased sampling efficacy before  
212 nesting, and increased sampling of non-nesting birds. As with nestlings, each adult received a unique  
213 four-band combination and was inspected for the absence or presence of *Philornis*. When present, we  
214 counted the number of active and empty *Philornis* wounds. We also recorded sex of adults based on  
215 crown colour, which is black for females and red for males.

216 We determined the nesting and breeder status of captured birds by monitoring nesting attempts  
217 and identifying attendant birds via focal nest watches. Nest watches involved 2 or 3 hour sessions in  
218 which an observer sat 15–20 m from a nest tree in a burlap blind, trained a 15X or 20X spotting scope on  
219 a focal cavity entrance for a nest, and recorded the identities (i.e., band combinations) and behaviors of

220 woodpeckers that visited the nest. For testing the hypothesis that *Philornis* parasitism in adults is  
221 associated with nesting, I coded adults as belonging to one of two categories: nesting or not nesting. I  
222 counted an adult as nesting if it met two criteria: (1) we observed the bird incubating at or provisioning  $\geq 1$   
223 nest within the year of capture, and (2) we captured the bird after the earliest possible clutch initiation  
224 date for its earliest possible nesting attempt within the year of capture. I counted banded birds as not  
225 nesting if they met one of the following criteria: (1) we captured the bird early in the field season before  
226 most nests were initiated (between January and before early April), or (2) the bird was not associated with  
227 a nesting attempt prior to the date of capture in the same calendar year.

228         Although we did not attempt to identify larvae to species, *Philornis pici* is the only *Philornis*  
229 species currently known to infest birds on Hispaniola, and, as mentioned earlier, was first described from  
230 the Hispaniolan Woodpecker (Macquart 1853). Elsewhere in the Dominican Republic, researchers have  
231 confirmed this species to parasitize Ridgway's Hawk (Hayes *et al.* 2019, Quiroga *et al.* 2020). However,  
232 *P. porteri* has also been identified parasitizing Ridgway's Hawk (M.A. Quiroga pers. comm.). The  
233 distribution of *P. porteri* on Hispaniola is currently unknown, but it is possible that the *Philornis* detected  
234 in the present study could be *P. pici*, *P. porteri*, or both.

235  
236 **Statistical analyses.** See Table 1 for a summary of the hypotheses and their predictions. For testing the  
237 hypothesis that nestlings are more vulnerable to *Philornis* parasitism than adults (H1), I tested the two  
238 predictions with separate generalized linear mixed-effects models (GLMMs). For the prediction that the  
239 probability of being parasitized is higher for nestlings than for adult birds (P1.1), I used a GLMM with a  
240 binomial fit to test for an association between infestation status and age coded as a categorical fixed effect  
241 (adult vs. nestling). Infestation status was treated as a binary response (0 = no evidence of *Philornis*, 1 =  
242 presence of  $\geq 1$  *Philornis* larvae, empty wounds, or both) in this model. For the prediction that nestlings  
243 host greater numbers of *Philornis* wounds than adults (P1.2), I used a GLMM with a negative binomial  
244 distribution to test for an association between the total number of *Philornis* wounds (summing the  
245 numbers of empty and active wounds, or total number of larvae) and age. Because many birds were never

246 observed with infestations, including all sampled individuals would lead to zero-inflation for the total  
247 number of *Philornis* wounds; consequently, I used a manual hurdle model approach, including only  
248 infested birds in this model.

249         To test the predictions of the hypotheses that (H2) nesting and (H3a, H3b) incubation and  
250 brooding investment are associated with *Philornis* parasitism in adults, I used four GLMMs to test for  
251 associations of adult infestation status with nesting status, sex, and the interaction of nesting status and  
252 sex. I coded both nesting status (nesting vs. not nesting) and sex (female vs. male) as categorical fixed  
253 effects for all four models. To test predictions regarding prevalence (P2.1, P3.1a, and P3.2a), I used  
254 GLMMs with a binomial fit: infestation status was treated as a binary response as with the analysis  
255 comparing nestlings and adults. For the first GLMM, I included all adults of known nesting status,  
256 retaining birds known not to have bred within the year of capture. For the second GLMM, I retained only  
257 birds known to have bred within the year of capture to exclude any effects of unanticipated differences  
258 between breeders and non-breeders. For testing the predictions regarding intensity as they relate to  
259 nesting status and sex (P2.2, P3.2a, and P3.2b), I used a GLMM with a Poisson distribution to test for an  
260 association of the total number of *Philornis* wounds (summing the numbers of active and empty wounds,  
261 or total number of larvae) with nesting status, sex, and the interaction effect of nesting status and sex. As  
262 with the nestling-adult comparison, many observations involved no infestation and would lead to zero-  
263 inflation for the total number of *Philornis* wounds; consequently, I used a manual hurdle model approach,  
264 including only infested adults in this model. Additionally, I only ran this model with the dataset that  
265 included all adults of known nesting status, including birds known not to have bred within the year of  
266 capture.

267         For all models, I also included capture date as a continuous fixed effect based on the following.  
268 The capture date range was fairly large (range = 168 d, 28-Feb–4-Aug), which included the end of the  
269 winter dry season, the short wet spring season, and the long dry summer season. Furthermore, previous  
270 studies have documented a positive association between the probability of adults and nests having  
271 *Philornis* and the timing of breeding (Arendt 1985a, Rabuffetti & Reboresda 2007). For all analyses, I

272 scaled capture date in day of year format via Z-transformation by subtracting the mean capture date and  
273 dividing by the standard deviation.

274 For all models except for those testing predictions regarding intensity only in adults (P2.2, P3.2a,  
275 and P3.2b), I included the following as random effects: the tree where a bird was captured or, for known  
276 breeders, where it bred in the year of capture (Tree ID); year of capture; and individual ID. I included  
277 Tree ID as a random effect because the Hispaniolan Woodpecker is unique among the Picidae, being one  
278 of only three known woodpecker species to exhibit facultative colonial nesting. Within the same  
279 population, Hispaniolan Woodpeckers pairs can nest singly or in clusters, with two or more pairs nesting  
280 concurrently in separate cavities on the same tree (Short 1974, Winkler *et al.* 1995, LaPergola 2018).  
281 Additionally, I wanted to account for the non-independence of nestlings from the same brood and thus the  
282 same parents, but using a nest ID random effect would have precluded using adults without nests. Using  
283 Tree ID as a random effect is thus a more conservative approach to account for non-independence,  
284 especially for nestlings. I included year as a random effect in all analyses because I was not confident that  
285 interannual variation was sampled adequately enough to interpret the fixed effects of year (Bennington &  
286 Thayne 1994). Lastly, I included individual ID because some individuals were captured multiple times.  
287 For testing predictions regarding intensity only in adults (P2.2, P3.2a, and P3.2b), I included only year as  
288 a random effect because including Tree ID and individual ID led to failed model convergence.

289 I conducted all statistical analyses in RStudio v. 1.1.463 using R v. 3.6.3 (R Core Team 2020).  
290 For fitting GLMMs, I used the *glmer* (binomial and Poisson fits) and *glmer.nb* (negative binomial)  
291 functions in the *lme4* package (Bates *et al.* 2015). For models where interaction terms were not  
292 significant, I report only the results of the additive models. All means are reported  $\pm$  the standard error of  
293 the mean, and all confidence intervals for count data are 95% and were calculated via the Wald Method.

294

## 295 **RESULTS**

### 296 **Summary of *Philornis* parasitism prevalence**

297 Over six years, I obtained 218 adult records representing 184 unique individuals (83 females and 101  
298 males), which included 26 individuals (eight females and 18 males) recaptured once and four individuals  
299 (one female and three males) recaptured twice. Of all adult records, 40 (18%; CI = 14–24%) included  
300 individuals with evidence of *Philornis* parasitism. Of all individuals ( $n = 184$ ), 36 (20%; CI = 14–26%)  
301 had evidence of *Philornis* parasitism, which included 24 (67%; CI = 50–80%;  $n = 36$  individuals) with  
302 *Philornis* empty wounds, nine (25%; CI = 14–41%) with active wounds, and three (8%; CI = 2–23%)  
303 with both empty and active wounds. Of all adults with more than one capture ( $n = 26$ ), 11 individuals  
304 exhibited changed infestation status (Table S1). These records included four individuals recaptured within  
305 the same year, of which two had active wounds on the second capture but no wounds on the first, one had  
306 old wounds on the first capture but not the second, and one individual had old wounds on the first capture  
307 but no visible wounds on the second capture 82 days later.

308 Across six years, I collected 554 nestling records representing 381 individuals from 127 nesting  
309 attempts. These figures amounted to a mean of  $4.4 \pm 2.4$  records per nesting attempt (range = 1–10  
310 records per nesting attempt) and a mean of  $3.0 \pm 1.0$  nestlings per nesting attempt (range = 1–5 nestlings  
311 per nesting attempt). Of all nestling records, 123 (22%; CI = 19–26%) showed evidence of *Philornis*  
312 parasitism, and of all nestlings observed, 107 (28%; CI = 24–33%) exhibited evidence of *Philornis*  
313 parasitism on at least one sampling event. Of the nestling individuals with evidence of *Philornis*, most  
314 (73%; CI = 64–80%) involved active wounds (45 observations with only active wounds and 33  
315 observations with both active and old wounds), while fewer observations involved only old wounds  
316 (19%; CI = 12–27%; for 8% of nestling observations, the wound status was not recorded). Infested  
317 nestlings came from 43 (34%; CI = 26–43%) of all monitored nesting attempts.

318

### 319 **H1: Comparison of adults and nestlings**

320 Using the full set of adult and nestling capture records, age and scaled day of year captured alone were  
321 not significant predictors of the presence/absence of *Philornis* parasitism (Table 2a). However, there was  
322 a significant interaction effect of age and scaled day of year captured, such that the probability of

323 exhibiting *Philornis* parasitism increased with the scaled day of year for nestlings but not for adults (Fig.  
324 2A). In contrast to presence/absence, age alone was significantly associated with the total number of  
325 *Philornis* wounds (empty plus active wounds) (Table 2b). Infested nestlings had an average of  $7.1 \pm 0.5$   
326 *Philornis* wounds (range = 1–39 *Philornis* wounds;  $n = 123$  nestling records) while infested adults had an  
327 average of only  $2.0 \pm 0.2$  wounds (range = 1–5 *Philornis* wounds;  $n = 40$  adult records; Fig. 2b).

328

### 329 **H2 and H3: Nesting status and sex**

330 When restricting the analyses to adults of known nesting status, there was no significant association  
331 between *Philornis* infestation and whether an adult was currently nesting (Table 3). This result was true  
332 for both the analysis including all adults of known nesting status, i.e., retaining birds known not to have  
333 bred within the capture year (Table 3a), and for the analysis restricted to only birds that nested within the  
334 capture year (Table 3b). Additionally, the scaled day of year was not significantly associated with  
335 infestation status. There was no significant interaction between sex and nesting status, but adult sex was  
336 significantly associated with infestation in both analyses. For all adults of known nesting status, 9% of  
337 females (CI = 4–17%;  $n = 82$  observations) and 27% of males (CI = 20–36%;  $n = 111$  observations)  
338 showed signs of current or past infestation (Figure 3). These proportions remained similar for the subset  
339 that included only birds that nested within the capture year (8% of females: CI = 4–18%,  $n = 60$   
340 observations; 26% of males: CI = 17–37%,  $n = 74$  observations).

341 Infested female and male adults had similar numbers of *Philornis* wounds. Infested females had a  
342 mean of  $2.0 \pm 0.7$  wounds (range = 1–5;  $n = 7$  observations), and infested males had a mean of  $2.0 \pm 0.2$   
343 (range = 1–5;  $n = 29$  observations). None of the fixed effects were significant in the model (Table 4).

344 The 12 adults with active infestations were mostly (58%) known breeders (Table S2). Two of the  
345 three females with active infestations also had infested nestlings at the time of capture. Of the nine males  
346 with active infestations, four had infested nestlings at the time of capture and one male had fledged two  
347 young (one infested and one not) one month prior to capture. The remaining individuals of uncertain

348 breeding status (one female and four males) were all caught within the known breeding season at the site  
349 (Fig. S1); the earliest capture was on 8 March and the latest capture 20 July.

350

## 351 **DISCUSSION**

352 Most previous work on *Philornis* myiasis has understandably focused on these parasites' impacts on  
353 nestling birds (Arendt 1985b, Dudaniec & Kleindorfer 2006, Hayes *et al.* 2019) since this life stage has  
354 long been considered the primary target of parasitism (Teixeira 1999). The present study is one of very  
355 few that has concurrently documented *Philornis* prevalence and intensity on nestlings and adults from the  
356 same population (see also Arendt 1985a). Intriguingly, adult Hispaniolan Woodpeckers were just as likely  
357 to exhibit evidence of *Philornis* as nestlings, although nestlings experienced greater intensity of  
358 infestation. For adults, while nesting status itself was not a significant predictor of being infested, males,  
359 which invest more in overall incubation and brooding, were significantly more likely to have *Philornis*  
360 infestations than females.

361

### 362 **Nestlings vs. adults**

363 The present study's results falsify the first prediction of the hypothesis that nestlings are more vulnerable  
364 to *Philornis* parasitism but support the second prediction that nestlings experience more intense  
365 infestations. While adult and nestling Hispaniolan Woodpeckers did not differ in the probability of being  
366 parasitized (Table 2a), the probability of being parasitized for nestlings did increase with passage of the  
367 breeding season yet remained more or less static for adults across the breeding season (Fig. 2a).  
368 Furthermore, when infested, nestlings bore greater numbers of *Philornis* wounds than did adult birds  
369 (Table 2b; Fig. 2b.). This difference in intensity is likely due to the increased accessibility of nestlings to  
370 *Philornis* flies in contrast to lower accessibility of adults. Of the two results and corresponding  
371 predictions, the contrast in *Philornis* intensity supports the hypothesis that nestlings are indeed more  
372 vulnerable to parasitism. However, the similarity in prevalence suggests a complementary hypothesis that  
373 adult *Philornis* are equally likely to find nestling and adult Hispaniolan Woodpeckers but that nestlings

374 are less resistant to infestation. Unfortunately, we currently lack the necessary *Philornis* natural history  
375 data to evaluate this possibility. If *Philornis* females oviposit directly in woodpecker nests, this behavior  
376 would help explain higher intensity of *Philornis* on nestling woodpeckers since adults would have even  
377 lower overall exposure to infestation. *Philornis downsi* oviposits in the nest material (Lahuatte et al.  
378 2016), and at least one subcutaneous species, *P. torquans*, will oviposit on inanimate surfaces in captivity  
379 (Patitucci et al. 2017, Saravia-Pietropaolo et al. 2018). It is therefore plausible, though yet to be  
380 confirmed, that *P. pici* and *P. porteri*, the two species most likely parasitizing Hispaniolan Woodpeckers,  
381 oviposit directly in the nest.

382         Regardless of the manner of egg/larval deposition, there are at least three non-mutually exclusive  
383 mechanistic hypotheses for lower parasite intensity on adults. First, the adults' well-developed plumage  
384 might reduce accessibility by presenting a physical barrier to burrowing larvae (Oniki 1983). This might  
385 be especially relevant for Hispaniolan Woodpeckers as they hatch naked and remain so until 7–8 d post-  
386 hatch when their pin feathers typically begin erupting, and while pin break begins around 14 d post-hatch,  
387 these feathers fail to cover most of the body other than the feather tracts until about 21 d post-hatch  
388 (unpubl. data). Thus the young have little to no physical barrier against *Philornis* other than a brooding  
389 adult for roughly their first three weeks. Hispaniolan Woodpecker nestlings also remain in the nest 29–38  
390 d post-hatch (unpubl. data), providing additional exposure time, albeit with an increasing amount of  
391 feather coverage. A non-mutually exclusive alternative hypothesis is that the greater mobility of adults  
392 reduces their accessibility to *Philornis* (Teixeira 1999). When not actively attending a nest, adults are  
393 literally moving targets for flies, covering areas of 1.7–4.2 km<sup>2</sup> while foraging (Mitchell & Bruggers  
394 1985), whereas nestlings remain relatively stationary, confined to the same nest cavity until fledging. A  
395 third hypothesis is that the immune memory of adult birds might make them better able to resist  
396 infestation. This immune defense hypothesis is plausible given that mother, but not nestling, Medium  
397 Ground Finches had elevated levels of *P. downsi*-binding antibody when exposed to the parasite (Koop et  
398 al. 2013). Whether any of these mechanisms can explain differences in *Philornis* infestation intensity for  
399 Hispaniolan Woodpeckers remains to be examined.



400           The patterns of *Philornis* prevalence and intensity reported here for Hispaniolan Woodpeckers  
401 contrast somewhat with those from the only other study (see Arendt 1985a) comparing nestlings and  
402 adults in the same population. Whereas *Philornis* prevalence among nestling Pearly-eyed Thrashers was  
403 much higher than for adults (96% vs. 31%, respectively; Arendt 1985a), prevalence was only non-  
404 significantly higher for nestling woodpeckers than for adults (28% vs. 20%). This contrast might be  
405 explained by two inter-related factors that differ between the Pearly-eyed Thrasher study and the present  
406 study: habitat and climate. The thrasher study took place in a tropical rainforest, with annual rainfall  
407 averaging 4460 mm (Arendt 1985a), while the present study occurred in more open, drier habitat, with  
408 annual rainfall of 1723 mm (Climate-data.org 2021). Rainfall is a significant predictor of *Philornis*  
409 infestation, showing a positive correlation with intensity (Antoniazzi *et al.* 2011, Manzoli *et al.* 2013),  
410 and moisture and humidity predict the geographic distribution of at least one *Philornis* species (Cuervo *et*  
411 *al.* 2021). The greater canopy cover and humidity of the rainforest might have promoted larger  
412 populations of adult *Philornis* than those in the drier habitat of the Dominican Republic, and these  
413 hypothetical larger fly populations might have more fully exploited the vulnerable nestling thrashers  
414 while adults could effectively avoid or prevent parasitism. Alternatively, the drier habitat on the  
415 Dominican Republic might have reduced access for adult *Philornis* because they would have needed to  
416 cross open (i.e., no canopy cover) habitat to reach woodpecker nests. In other words, the Hispaniolan  
417 Woodpecker's habitat structure provides a barrier for adult *Philornis* so they are prevented from fully  
418 exploiting the vulnerable nestling woodpeckers. The pattern of intensity differences was similar, though:  
419 both nestling thrashers and woodpeckers had greater intensity of *Philornis* than adult birds, and this aligns  
420 with the second prediction of the hypothesis that nestlings in both species are more vulnerable to  
421 *Philornis* parasitism.

422           One limitation of the present study was that the precise timing of active infestation for adults was  
423 often unknown, especially relative to timing of nesting. This issue arose because most evidence of  
424 *Philornis* on adult Hispaniolan Woodpeckers was in the form of empty wounds rather than active wounds  
425 containing larvae (33% of adult records involved wounds containing  $\geq 1$  larvae). In contrast, most

426 nestling observations involved active wounds. This difference is due in part to the sampling effort relative  
427 to the age of target birds. Nestling Hispaniolan Woodpeckers were sampled at known ages and within 25  
428 days of hatching so the period of exposure was limited, increasing the probability of detecting  
429 subcutaneous *Philornis* larvae, which can remain attached for 5–8 days (Arendt 1985a, Young 1993). The  
430 exposure period for adult birds bearing empty wounds, however, was presumably all the days they lived  
431 prior to the date of capture, decreasing the probability that we would detect their wounds when they  
432 contained larvae. This limitation is important for two reasons regarding timing. First, while it might be  
433 most parsimonious to assume all adult Hispaniolan Woodpeckers with empty *Philornis* wounds were  
434 infested as adults, we do not know the maximum number of days empty wounds persist after larval  
435 detachment from woodpeckers. This uncertainty means that some adults bearing empty wounds might  
436 have been infested as nestlings though this seems unlikely. Quiroga et al. (2020, p. 2) posited that all  
437 adults in their sample were likely parasitized as adults because “scars [i.e., empty wounds] usually heal  
438 ca. one week after larvae detach from the host...”. There are few published accounts of the time it takes  
439 for an empty wound from a subcutaneous *Philornis* infestation to heal completely and leave no visible  
440 trace, but scars left by subcutaneous *Philornis* after removal from nestling hosts of three species  
441 (Baywings *Agelaioides badius*; Screaming Cowbirds *Molothrus rufoaxillaris*; and Shiny Cowbirds *M.*  
442 *bonariensis*) lasted at least two days (Ursino et al. 2019). Second, uncertainty of adult exposure  
443 potentially reduces the accuracy of nestling-adult seasonality comparisons.

444         The difference between adults and nestling Hispaniolan Woodpeckers with respect to the  
445 seasonality of prevalence begs further consideration. The lack of an effect of day of capture on prevalence  
446 in adults might be related to the abovementioned limitation: i.e., sampling date relative to the day(s) of  
447 active infestation. Because the majority of nestling observations involved active wounds while most adult  
448 records only involved empty wounds, the day of capture for adults was a less reliable indicator of the  
449 timing of infestation for them. In other words, it could be that adults showed the same type of seasonality  
450 in infestation as nestlings, with the probability of being infested increasing as the season progressed, but  
451 the sampling effort precluded detecting such a pattern. If the difference in seasonality between adults and

452 nestlings was a real pattern, though, Hispaniolan Woodpeckers would differ from Pearly-eyed Thrashers,  
453 in which adults showed increasing prevalence of *Philornis* as the season progressed but prevalence among  
454 nestlings was high throughout the nesting season (Arendt 1985a). To more fully understand the  
455 seasonality of *Philornis* infestation will require data on the seasonality of emergence and population  
456 dynamics of adult flies (e.g., Causton et al. 2019). Unfortunately, there are no published data on the  
457 seasonality of *Philornis* emergence for Hispaniola.

458

#### 459 **Nesting status, sex, and brooding/incubation investment**

460 The nesting status of Hispaniolan Woodpecker adults was not significantly associated with prevalence nor  
461 intensity of *Philornis* parasitism (Tables 3 & 4), refuting the two predictions of the hypothesis that such  
462 parasitism is associated with nesting. To the best of my knowledge, these results represent the first direct  
463 test of this hypothesis. The lack of an effect of nesting status in the present study could be an artifact of  
464 the sampling period, which mostly comprised the nesting season. However, the inclusion of adults known  
465 to not be actively nesting at the time of capture should lessen the impact of such an artifact. Another  
466 possible limitation was the uncertainty around the time when an adult was first infested because it makes  
467 it harder to discern the amount of overlap between infestation and nesting. It will be crucial to more  
468 precisely define the window of infestation for sampled adults to accurately compare prevalence and  
469 intensity among nesting and non-nesting birds in future studies. One could achieve increased accuracy  
470 here by sampling more birds in the non-breeding season and capturing more adults when they have chicks  
471 of known age. However, it is worth considering whether the observed pattern is not an artifact, i.e.,  
472 nesting and non-nesting Hispaniolan Woodpeckers are equally likely to be parasitized. If *Philornis*  
473 typically finds hosts by searching for nest-related cues (e.g., olfactory), adult Hispaniolan Woodpeckers  
474 might be parasitized outside the context of actively breeding if they spend time in nest cavities for other  
475 activities. For example, Hispaniolan Woodpeckers roost in previously used nest cavities (pers. obs.). If  
476 the cues adult *Philornis* use to find nestlings remain detectable, opportunistic parasitism of adult  
477 woodpeckers could occur. Such a scenario might apply in the non-breeding season or even within the

478 breeding season prior to active nesting. One could test this idea experimentally by setting un-baited traps  
479 for adult *Philornis* in old or recently used cavities. Another possible reason that nesting status might be  
480 less relevant for Hispaniolan Woodpeckers concerns their habit of colonial nesting. For example, adults  
481 lacking active nests might still be subjected to parasitism when one or more other colony members are  
482 nesting and thus attracting adult *Philornis*. This hypothesis and the impacts of colonial nesting on  
483 *Philornis* parasitism more broadly warrant further study since group-living can either increase (Brown &  
484 Brown 1986) or decrease (Mooring & Hart 1992) the risk of parasitism. Local heterospecific nesting  
485 density was associated with increased intensity of the invasive *P. downsi* (Kleindorfer & Dudaniec 2009),  
486 indicating that this hypothesis is well worth investigating in the native ranges of *Philornis* (e.g., see  
487 Antoniazzi et al. 2011).

488         The combined results of adult Hispaniolan Woodpeckers being parasitized regardless of nesting  
489 status and nestlings and adults exhibiting similar prevalence suggest that parasitism of adult woodpeckers  
490 might be part of a mixed strategy by *Philornis* in which they target adult birds. As suggested by Quiroga  
491 et al. (2020), such a strategy might allow flies to reproduce when nestlings are unavailable or in short  
492 supply. In the present study, the Hispaniolan Woodpecker population had a defined breeding season,  
493 beginning in early March, peaking in May, and tapering off in August (LaPergola 2018) so nestling  
494 woodpeckers are unavailable for approximately half the year and only abundant for roughly three months.  
495 Some other local species that might host *Philornis* (e.g., *Crotophaga ani*, *Columbina passerina*, *Zenaida*  
496 *aurita*, *Z. asiatica*, and *Coereba flaveola*) have been suggested to breed year-round (Latta et al. 2006), but  
497 the extent to which they do so in addition to whether they are parasitized at the study site remains  
498 unknown. Additionally, capture records of Hispaniolan Woodpeckers from the site are unavailable from  
499 most of the non-breeding season, especially September through December. Fully testing this hypothesis  
500 that *Philornis* target adult birds when nestlings are unavailable or scarce requires year-round monitoring  
501 for infestation of both adults and nestlings and data on the availability and abundance of host nestlings.

502         Despite the non-significant effect of nesting status, there was some support for the hypothesis that  
503 *Philornis* parasitism is associated with incubation and brooding investment in Hispaniolan Woodpeckers.

504 Although the sexes did not differ in intensity of infestation, males were 3.4 times more likely than  
505 females to host *Philornis*. This result mirrors the pattern observed in Pearly-eyed Thrashers, where  
506 females, who are the sole incubators/brooders, were 3.5 times more likely to host *Philornis* than males  
507 (Arendt 1985a). Since female Hispaniolan Woodpeckers perform only diurnal incubation/brooding while  
508 males perform diurnal *and* nocturnal incubation/brooding, males might experience increased *Philornis*  
509 exposure at night. Unfortunately, almost nothing is known about the temporal activity patterns of  
510 *Philornis* on Hispaniola nor for most other *Philornis* with subcutaneous larvae. In the Galápagos, adult *P.*  
511 *downsi* enter host nests to oviposit when the parent birds are absent during the day when nestlings are  
512 young and at night when nestlings are older (O'Connor *et al.* 2010), and peak nest visitation rates of adult  
513 flies occurs in the late afternoon and dusk in the nestling phase (Pike *et al.* 2021). But *P. downsi* larvae  
514 are free-living and hematophagous and eggs are oviposited in the nest. An important assumption of the  
515 hypothesis that nocturnal incubation increases exposure thus needs testing. Additionally, the lack of an  
516 interaction effect of nesting status and sex suggests alternative hypotheses warrant testing.

517         Three major sets of alternative explanations for higher prevalence of *Philornis* among adult male  
518 Hispaniolan Woodpeckers are sexual dimorphisms in behavior, morphology, and immunology (Zuk &  
519 McKean 1996). One behavioral difference could be that males experience greater exposure by spending  
520 more time in a particular site or habitat (e.g., Tinsley 1989). For example, male Hispaniolan Woodpeckers  
521 might spend more time than females in cavities overall, even when not tending a nest with eggs or young.  
522 This could be the case if males played a larger role in defending cavities from competitors and were thus  
523 more likely to encounter *Philornis* searching for nestlings. Another behavioral difference might be that  
524 males simply invest less in anti-parasitic behaviors like preening and grooming such that they are less  
525 likely than females to remove *Philornis*. At present, it is unknown whether male and female Hispaniolan  
526 Woodpeckers differ in preening behavior. In at least some bird species, though, males tend to spend more  
527 time grooming rather than less (Cotgreave & Clayton 1994, Oswald *et al.* 2019). With respect to  
528 morphology, male Hispaniolan Woodpeckers have bills that are on average 25% longer than those of  
529 females (unpubl. data; see also Selander 1966), and it could be that their longer bills reduce their

530 effectiveness at removing *Philornis* eggs or larvae. Male Hispaniolan Woodpeckers are also larger in  
531 other dimensions of size, including weight, and it could be that their larger size increases the probability  
532 that they miss a parasite during preening. Lastly, with regards to immunology, male Hispaniolan  
533 Woodpeckers might be more tolerant and/or less resistant to *Philornis* infestation. Widespread evidence  
534 exists for sex differences in immunocompetence (e.g., Kelly et al. 2018), but to the best of my knowledge,  
535 this possibility remains unstudied with respect to *Philornis*. These alternative behavioral, morphological,  
536 and immunological explanations clearly warrant future study.

537

### 538 **Future considerations and implications for *Philornis* biology**

539 Inter-population comparisons of *Philornis* parasitism in Hispaniolan Woodpeckers could be a fruitful  
540 course of future research since this woodpecker occupies a range of habitats and elevations. The *Philornis*  
541 prevalence on adult woodpeckers documented in the present study was the same as that reported for the  
542 species at nearby Rancho Baiguat (H.M. Garrod pers. comm.; Quiroga *et al.* 2020) but higher than that  
543 reported from coastal, low elevation Punta Cana (7%; L. Soares and S.C. Latta pers. comm.; Quiroga *et*  
544 *al.* 2020). Whether these differences correspond to *Philornis* population sizes differing according to  
545 habitat or climatic conditions could be explored with the Hispaniolan Woodpecker.

546       Though the difference in nestling and adult *Philornis* infestation intensity is suggestive of a  
547 preference for nestlings by botflies, more work is needed to robustly test this hypothesis. In studies of  
548 choice and decision-making, confirming the presence of a positive association provides support for a  
549 preference hypothesis, but a more discriminating test involves an experimental choice assay (Dougherty  
550 2020). Similar approaches reveal host preferences in insects (e.g., Linn *et al.* 2003). In this case,  
551 presenting adult *Philornis* with a choice test between depositing eggs on a nestling or adult bird would be  
552 most revealing. Additionally, it is often assumed that parasitizing nestlings yields a higher fitness payoff,  
553 but this hypothesis, as far as I know, remains untested.

554       Given the observed prevalence and intensity of *Philornis* on both nestlings and adults, the  
555 Hispaniolan Woodpecker would make an excellent model system to study this parasite's biology. For

556 example, it would be revealing to conduct *Philornis* exclusion experiments to better understand how non-  
557 nesting use of cavities impacts parasitism outside the breeding season or even for non-breeders during the  
558 nesting season. The woodpecker's abundance would also facilitate testing alternative *Philornis*  
559 management programs before using them with species of conservation concern.

560

## 561 REFERENCES

- 562 **Antoniazzi, L.R., Manzoli, D.E., Rohrmann, D., Saravia, M.J., Silvestri, L. & Beldomenico, P.M.**  
563 2011. Climate variability affects the impact of parasitic flies on Argentinean forest birds. *J. Zool.*  
564 **283**: 126–134.
- 565 **Arendt, W.J.** 1985a. *Philornis* ectoparasitism of Pearly-eyed Thrashers. II. Effects on adults and  
566 reproduction. *Auk* **102**: 281–292.
- 567 **Arendt, W.J.** 1985b. *Philornis* ectoparasitism of Pearly-eyed Thrashers. I. Impact on growth and  
568 development of nestlings. *Auk* **102**: 270–280.
- 569 **Bates, D., Mächler, M., Bolker, B. & Walker, S.** 2015. Fitting linear mixed-effects models using lme4.  
570 *J. Stat. Softw.* **67**: 1–48.
- 571 **Bennington, C.C. & Thayne, W. V.** 1994. Use and misuse of mixed model analysis of variance in  
572 ecological studies. *Ecology* **75**: 717–722.
- 573 **Brown, C.R. & Brown, M.B.** 1986. Ectoparasitism as a cost of coloniality in Cliff Swallows (*Hirundo*  
574 *pyrrhonota*). *Ecology* **67**: 1206–1218.
- 575 **Causton, C.E., Moon, R.D., Cimadom, A., Boulton, R.A., Cedeño, D., Lincango, M.P., Tebbich, S.**  
576 **& Ulloa, A.** 2019. Population dynamics of an invasive bird parasite, *Philornis downsi* (Diptera:  
577 Muscidae), in the Galapagos Islands. *PLoS One* **14**: e0224125.
- 578 **Climate-data.org.** 2021. *Climate Jarabacoa (Dominican Republic)*. Available at: [https://en.climate-](https://en.climate-data.org/north-america/dominican-republic/la-vega/jarabacoa-766532/)  
579 [data.org/north-america/dominican-republic/la-vega/jarabacoa-766532/](https://en.climate-data.org/north-america/dominican-republic/la-vega/jarabacoa-766532/) (Accessed on 10 December  
580 2021).
- 581 **Common, L.K., Dudaniec, R.Y., Colombelli-Négrel, D. & Kleindorfer, S.** 2019. Taxonomic shifts in

- 582 *Philornis* larval behaviour and rapid changes in *Philornis downsi* Dodge & Aitken (Diptera:  
583 Muscidae): an invasive avian parasite on the Galápagos Islands. In Sarwar, M. (ed): *Life Cycle and*  
584 *Development of Diptera*: 1–22. London: IntechOpen.
- 585 **Cotgreave, P. & Clayton, D.H.** 1994. Comparative analysis of time spent grooming by birds in relation  
586 to parasite load. *Behaviour* **131**: 171–187.
- 587 **Cuervo, P.F., Percara, A., Monje, L., Beldomenico, P.M. & Quiroga, M.A.** 2021. Environmental  
588 variables determining the distribution of an avian parasite: the case of the *Philornis torquans*  
589 complex in South America. *Med. Vet. Entomol.* **35**: 284–292.
- 590 **Delanoy, C.A. & Cruz, A.** 1991. *Philornis* parasitism and nestling survival of the Puerto Rican Sharp-  
591 Shinned Hawk. In Loye, J.E. & Zuk, M. (eds) *Bird-parasite Interactions*: 93–103. Oxford: Oxford  
592 University Press.
- 593 **Dougherty, L.R.** 2020. Designing mate choice experiments. *Biol. Rev.* **95**: 759–781.
- 594 **Dudaniec, R.Y. & Kleindorfer, S.** 2006. Effects of the parasitic flies of the genus *Philornis* (Diptera:  
595 Muscidae) on birds. *Emu* **106**: 13–20.
- 596 **Fessl, B., Sinclair, B.J. & Kleindorfer, S.** 2006. The life-cycle of *Philornis downsi* (Diptera: Muscidae)  
597 parasitizing Darwin’s finches and its impacts on nestling survival. *Parasitology* **133**: 739–747..
- 598 **Garrod, H.M. & LaPergola, J.B.** 2018. Overlap in molt and breeding phenology in the Hispaniolan  
599 Woodpecker (*Melanerpes striatus*). *Ornitol. Neotrop.* **68(Special Is)**: 29–36.
- 600 **Hayes, C.D., Hayes, T.I., McClure, C.J.W., Quiroga, M., Thorstrom, R.K. & Anderson, D.L.** 2019.  
601 Native parasitic nest fly impacts reproductive success of an island-endemic host. *Anim. Conserv.* **22**:  
602 157–164.
- 603 **Huber, S.K., Owen, J.P., Koop, J.A.H., King, M.O., Grant, P.R., Grant, B.R. & Clayton, D.H.** 2010.  
604 Ecoimmunity in Darwin’s finches: Invasive parasites trigger acquired immunity in the medium  
605 ground finch (*Geospiza fortis*). *PLoS One* **5**.
- 606 **Huebner, D.P. & Hurteau, S.R.** 2007. An economical wireless cavity-nest viewer. *J. F. Ornithol.* **78**:  
607 87–92.



- 608 **Kelly, C.D., Stoehr, A.M., Nunn, C., Smyth, K.N. & Prokop, Z.M.** 2018. Sexual dimorphism in  
609 immunity across animals: a meta-analysis. *Ecol. Lett.* **21**: 1885–1894.
- 610 **Kleindorfer, S. & Dudaniec, R.Y.** 2009. Love thy neighbour? Social nesting pattern, host mass and nest  
611 size affect ectoparasite intensity in Darwin’s tree finches. *Behav. Ecol. Sociobiol.* **63**: 731–739.
- 612 **Kleindorfer, S. & Dudaniec, R.Y.** 2016. Host-parasite ecology, behavior and genetics: a review of the  
613 introduced fly parasite *Philornis downsi* and its Darwin’s finch hosts. *BMC Zool.* **1**: 1.
- 614 **Koop, J.A.H., Owen, J.P., Knutie, S.A., Aguilar, M.A. & Clayton, D.H.** 2013. Experimental  
615 demonstration of a parasite-induced immune response in wild birds: Darwin’s finches and  
616 introduced nest flies. *Ecol. Evol.* **3**: 2514–2523.
- 617 **Lahuatte, P.F., Lincango, M.P., Heimpel, G.E. & Causton, C.E.** 2016. Rearing larvae of the avian nest  
618 parasite, *Philornis downsi* (Diptera: Muscidae), on chicken blood-based diets. *J. Insect Sci.* **16**: 1–7.
- 619 **LaPergola, J.B.** 2018. *Behavioral ecology of coloniality in the Hispaniolan Woodpecker*. Dissertation,  
620 Cornell University, Ithaca, New York, U.S.A.
- 621 **Latta, S., Rimmer, C., Allan, K., Wiley, J., Raffaele, H., McFarland, K. & Fernandez, E.** 2006. *Birds*  
622 *of the Dominican Republic and Haiti*. Princeton: Princeton University Press.
- 623 **Leuba, C., Tebbich, S., Nemeth, E., Anchundia, D., Heyer, E., Mosquera, D.A., Richner, H., Rojas**  
624 **Allieri, M.L., Sevilla, C. & Fessl, B.** 2020. Effect of an introduced parasite in natural and  
625 anthropogenic habitats on the breeding success of the endemic little vermilion flycatcher  
626 *Pyrocephalus nanus* in the Galápagos. *J. Avian Biol.* **51**: 1–13.
- 627 **Linn, C., Feder, J.L., Nojima, S., Dambroski, H.R., Berlocher, S.H. & Roelofs, W.** 2003. Fruit odor  
628 discrimination and sympatric host race formation in *Rhagoletis*. *Proc. Natl. Acad. Sci. U. S. A.* **100**:  
629 11490–11493.
- 630 **Little, S.E.** 2009. Myiasis in Wild Birds. In Atkinson, C.T., Thomas, N.J. & Hunter, D.B. (eds) *Parasitic*  
631 *Diseases of Wild Birds*: 546–556. Oxford: Wiley-Blackwell.
- 632 **Macquart, J.** 1853. Notice sur une nouvelle espèce d’aricie, diptère de la tribu des anthomyzides. *Ann. la*  
633 *Société Entomol. Fr. Series 3*: 567–661.

- 634 **Manzoli, D.E., Antoniazzi, L.R., Saravia, M.J., Silvestri, L., Rorhmann, D. & Beldomenico, P.M.**  
635 2013. Multi-level determinants of parasitic fly infection in forest passerines. *PLoS One* **8**: e67104.
- 636 **Mitchell, B. & Bruggers, R.L.** 1985. Aspects of woodpecker damage to cacao in the Dominican  
637 Republic. *Trop. Pest Manag.* **31**: 148–152.
- 638 **Mooring, M.S. & Hart, B.L.** 1992. Animal grouping for protection from parasites: selfish herd and  
639 encounter-dilution effects. *Behaviour* **123**: 173–193.
- 640 **Nilsson, S.G.** 1986. Evolution of hole-nesting in birds: on balancing selection pressures. *Auk* **103**: 432–  
641 435.
- 642 **Kelly, C.D., Stoehr, A.M., Nunn, C., Smyth, K.N. & Prokop, Z.M.** 2018. Sexual dimorphism in  
643 immunity across animals: a meta-analysis. *Ecol. Lett.* **21**: 1885–1894.
- 644 **O'Connor, J.A., Robertson, J. & Kleindorfer, S.** 2010. Video analysis of host-parasite interactions in  
645 nests of Darwin's finches. *Oryx* **44**: 588–594.
- 646 **Oniki, Y.** 1983. Notes on fly (Muscidae) parasitism of nestlings of South American birds. *Le Gerfaut* **73**:  
647 281–286.
- 648 **Oswald, K.N., Smit, B., Lee, A.T.K. & Cunningham, S.J.** 2019. Behaviour of an alpine range-restricted  
649 species is described by interactions between microsite use and temperature. *Anim. Behav.* **157**: 177–  
650 187.
- 651 **Patitucci, L.D., Quiroga, M., Couri, M.S. & Saravia-Pietropaolo, M.J.** 2017. Oviposition in the bird  
652 parasitic fly *Philornis torquans* (Nielsen, 1913) (Diptera: Muscidae) and eggs' adaptations to dry  
653 environments. *Zool. Anz.* **267**: 15–20.
- 654 **Pike, C.L., Ramirez, I.E., Anchundia, D.J., Fessl, B., Heimpel, G.E. & Causton, C.E.** 2021. Behavior  
655 of the avian parasite *Philornis downsi* (Diptera: Muscidae) in and near host nests in the Galapagos  
656 Islands. *J. Insect Behav.* **34**: 296–311.
- 657 **Quiroga, M.A., Hayes, T.I., Hayes, C.D., Garrod, H., Soares, L., Knutie, S.A., Latta, S.C. &**  
658 **Anderson, D.L.** 2020. More than just nestlings: incidence of subcutaneous *Philornis* (Diptera:  
659 Muscidae) nest flies in adult birds. *Parasitol. Res.* **119**: 2337–2342.

- 660 **R Core Team.** 2020. *R: A Language and Environment for Statistical Computing*. Vienna: R Foundation  
661 for Statistical Computing.
- 662 **Rabuffetti, F.L. & Reboreda, J.C.** 2007. Early infestation by bot flies (*Philornis seguyi*) decreases chick  
663 survival and nesting success in chalk-browed mockingbirds (*Mimus saturninus*). *Auk* **124**: 898–906.
- 664 **Saravia-Pietro Paolo, M.J., Arce, S.I., Manzoli, D.E., Quiroga, M. & Beldomenico, P.M.** 2018.  
665 Aspects of the life cycle of the avian parasite *Philornis torquans* (Diptera: Muscidae) under  
666 laboratory rearing conditions. *Can. Entomol.* **150**: 317–325.
- 667 **Selander, R.K.** 1966. Sexual dimorphism and differential niche utilization in birds. *Condor* **68**: 113–151.
- 668 **Short, L.L.** 1974. Habits of three endemic West Indian woodpeckers (Aves, Picidae). *Am. Museum Novit.*  
669 **2549**: 1–44.
- 670 **Stanback, M.T. & Koenig, W.D.** 1994. Techniques for capturing birds inside natural cavities. *J. F.*  
671 *Ornithol.* **65**: 70–75.
- 672 **Teixeira, D.M.** 1999. Myiasis caused by obligatory parasites. Ib. General observations on the biology of  
673 the species of the genus *Philornis* Meinert, 1890 (Diptera, Muscidae). In Guimarães, J.H. &  
674 Papavero, N. (eds) *Myiasis in Man and Animals in the Neotropical Region. Bibliographic Database*:  
675 71–96. Sao Paulo: Editora Pleiade.
- 676 **Tinsley, R.C.** 1989. The effects of host sex on transmission success. *Parasitol. Today* **5**: 190–195.
- 677 **Ursino, C.A., De Mársico, M.C. & Reboreda, J.C.** 2019. Brood parasitic nestlings benefit from unusual  
678 host defenses against botfly larvae (*Philornis* spp.). *Behav. Ecol. Sociobiol.* **73**.
- 679 **Waldstein, A.L.** 2012. An inexpensive camera system for monitoring cavity nests. *J. F. Ornithol.* **83**:  
680 302–305.
- 681 **Winkler, H., Christie, D.A. & Nurney, D.** 1995. *Woodpeckers: an Identification Gguide to the*  
682 *Woodpeckers of the World*. Boston: Houghton Mifflin.
- 683 **Young, B.E.** 1993. Effects of the parasitic botfly *Philornis carinatus* on nestling House Wrens,  
684 *Troglodytes aedon*, in Costa Rica. *Oecologia* **93**: 256–262.
- 685 **Zuk, M. & McKean, K.A.** 1996. Sex differences in parasite infections: patterns and processes. *Int. J.*

686 *Parasitol.* **26**: 1009–1024.

687

688 **SUPPORTING INFORMATION**

689 Additional Supporting information may be found in the online version of this article:

690 **Figure S1.** *Hispaniolan Woodpecker hatch date histogram with earliest and latest adult capture dates.*

691 **Table S1.** *Individual adult Hispaniolan Woodpeckers recapture records.*

692 **Table S2.** *Individual adult Hispaniolan Woodpeckers with active Philornis infestations.*

693

**Table 1.** Summary of hypotheses and predictions regarding *Philornis* infestation status.

| <b>Hypothesis</b>                                                                               | <b>Prediction</b>                                                                                                                                                                                           |
|-------------------------------------------------------------------------------------------------|-------------------------------------------------------------------------------------------------------------------------------------------------------------------------------------------------------------|
| H1: Nestlings are more vulnerable than adults to <i>Philornis</i> parasitism.                   | P1.1: <i>Philornis</i> prevalence is higher for nestlings than for adults.<br>P1.2: Infested nestlings host more <i>Philornis</i> larvae than adults.                                                       |
| H2: Nesting is associated with <i>Philornis</i> parasitism of adults.                           | P2.1: <i>Philornis</i> prevalence is higher in nesting birds than birds not nesting.<br>P2.2: Nesting birds host more <i>Philornis</i> larvae than birds not nesting.                                       |
| H3a: <i>Philornis</i> parasitism is associated with diurnal incubation and brooding investment. | P3.1a: <i>Philornis</i> prevalence is equal for nesting males and females, who share daytime incubation and brooding.<br>P3.2a: Infested males and females host similar numbers of <i>Philornis</i> larvae. |
| H3b: <i>Philornis</i> parasitism is associated with total incubation and brooding investment.   | P3.1b: <i>Philornis</i> prevalence is higher for males, the sex that conducts nocturnal incubation and brooding.<br>P3.2b: Infested males host more <i>Philornis</i> larvae.                                |

695

**Table 2.** Results of two generalized linear mixed-effects models testing for an association of *Philornis* parasitism with age in Hispaniolan Woodpeckers. Model (a) included the binary response of *Philornis* parasitism (yes/no) and fixed effects of age (adult vs. nestling), scaled date of capture (DOY scaled), and their interaction, and was fit with a binomial distribution. Model (b) tested for an association of total number of *Philornis* wounds on infested birds only with age, DOY scaled, and their interaction, and was fit with a negative binomial distribution. Random effects for both models were individual identity (a:  $n = 559$  individuals; b:  $n = 143$  individuals), year of capture ( $n = 6$  years in both a and b), and tree ID where captured or bred (a:  $n = 41$  trees; b:  $n = 25$  trees).

| <b>Model and factors</b>                  | <b>Estimate ± S.E.</b> | <b>z-value</b> | <b>P</b>            |
|-------------------------------------------|------------------------|----------------|---------------------|
| a. <i>Philornis</i> parasitism (yes/no)   |                        |                |                     |
| Intercept                                 | -3.092 ± 0.971         | -3.184         | 0.00145 **          |
| Age (nestling)                            | -0.689 ± 0.365         | -1.888         | 0.059               |
| DOY Scaled                                | 0.170 ± 0.205          | 0.829          | 0.407               |
| <b><i>Age (nestling) * DOY Scaled</i></b> | <b>2.383 ± 0.438</b>   | <b>5.443</b>   | <b>5.25e-08 ***</b> |
| b. Total <i>Philornis</i> wounds          |                        |                |                     |
| Intercept                                 | 0.598 ± 0.192          | 3.113          | 0.00185 **          |
| <b><i>Age (nestling)</i></b>              | <b>0.935 ± 0.191</b>   | <b>4.895</b>   | <b>9.82e-07 ***</b> |
| DOY scaled                                | -0.004 ± 0.085         | -0.047         | 0.962               |

696

697

**Table 3.** Results of two generalized linear mixed-effects models testing for an association of the binary response of *Philornis* parasitism (yes/no) of adult Hispaniolan Woodpeckers with sex (female or male), nesting status (actively nesting or not nesting at time of capture), the interaction of sex and nesting status, and the scaled day of the year captured (DOY scaled). Random effects were individual identity (a:  $n = 163$  individuals; b:  $n = 113$  individuals), tree ID where an individual was captured or bred (a:  $n = 30$  trees; b:  $n = 27$  trees), and year of capture ( $n = 6$  years in both a and b). Model (a) included the full set of individuals with known nesting status within a year, including individuals that never bred (non-breeders) within the capture year ( $n = 193$  observations). Model (b) included only individuals that were known to have bred within the capture year ( $n = 134$  observations).

| <b>Model and factors</b>                                             | <b>Estimate <math>\pm</math> S.E.</b> | <b>z-value</b> | <b>P</b>         |
|----------------------------------------------------------------------|---------------------------------------|----------------|------------------|
| a. <i>Philornis</i> parasitism (yes/no) on breeders and non-breeders |                                       |                |                  |
| Intercept                                                            | -3.116 $\pm$ 0.874                    | -3.565         | 0.0004           |
| <b><i>Sex (male)</i></b>                                             | <b>1.674 <math>\pm</math> 0.483</b>   | <b>3.468</b>   | <b>0.0005***</b> |
| Nesting Status (not nesting)                                         | 0.312 $\pm$ 0.651                     | 0.480          | 0.632            |
| DOY Scaled                                                           | 0.091 $\pm$ 0.307                     | 0.297          | 0.767            |
| b. <i>Philornis</i> parasitism (yes/no) on breeders only             |                                       |                |                  |
| Intercept                                                            | - 3.391 $\pm$ 0.961                   | -3.529         | 0.0004           |
| <b><i>Sex (male)</i></b>                                             | <b>1.697 <math>\pm</math> 0.592</b>   | <b>2.869</b>   | <b>0.0041**</b>  |
| Nesting Status (not nesting)                                         | 1.221 $\pm$ 0.898                     | 1.360          | 0.174            |
| DOY Scaled                                                           | 0.475 $\pm$ 0.384                     | 1.238          | 0.216            |

698

**Table 4.** Results of a generalized linear mixed-effect model with a Poisson distribution testing for an association between the total number of *Philornis* wounds on adult Hispaniolan Woodpeckers and sex (female or male), nesting status (actively nesting or not nesting at time of capture), the interaction of sex and nesting status, and scaled day of year captured (DOY scaled), including year as a random effect ( $n = 4$  years). This analysis used birds of known nesting status ( $n = 36$  observations), including birds that bred and those that did not within the year of capture.

| <b>Factors</b>               | <b>Estimate <math>\pm</math> S.E.</b> | <b>z-value</b> | <b>P</b> |
|------------------------------|---------------------------------------|----------------|----------|
| Intercept                    | 0.601 $\pm$ 0.357                     | 1.684          | 0.0921   |
| Sex (male)                   | 0.045 $\pm$ 0.230                     | 0.150          | 0.8804   |
| Nesting Status (not nesting) | 0.100 $\pm$ 0.454                     | 0.220          | 0.8256   |
| DOY Scaled                   | -0.126 $\pm$ 0.232                    | -0.543         | 0.5874   |



699 **Figure legends**

700 **Figure 1.** Example of active and empty wounds associated with *Philornis* parasitism in Hispaniolan  
701 Woodpeckers. (A) Active wounds containing three *Philornis* larvae (indicated by white arrows) on a  
702 nestling woodpecker's leg, where the posterior spiracles of larvae are visible. Two larvae inhabit one  
703 wound while one larva inhabits an adjacent wound. (B) Empty *Philornis* wound on an adult male  
704 woodpecker's face. All photos by author.

705  
706 **Figure 2.** Probability and intensity of *Philornis* parasitism on adult and nestling Hispaniolan  
707 Woodpeckers. (A) Probability of *Philornis* parasitism plotted as raw data (adults = blue circles,  $n = 218$   
708 observations; nestlings = gray triangles,  $n = 554$  observations) and model predictions from a generalized  
709 linear mixed model testing for an association with age, day of year captured, and their interaction. The  
710 blue solid line and black dashed line represent model predictions for adults and nestlings, respectively.  
711 Raw data were artificially vertically separated to improve visibility of points. (B) Raincloud plot  
712 comparing adults ( $n = 40$  observations) and nestlings ( $n = 123$  observations) for the total number of  
713 *Philornis* wounds observed on infested individuals (i.e., only non-zero values for the total number of  
714 *Philornis* wounds). Sample sizes indicate the number of observations.

715  
716 **Figure 3.** Proportion of female and male adult Hispaniolan Woodpeckers with  $\geq 1$  *Philornis* parasite.  
717 Male woodpeckers were significantly more likely to be infested (Table 3). Error bars represent 95%  
718 confidence intervals. Sample sizes indicate the number of observations.

719

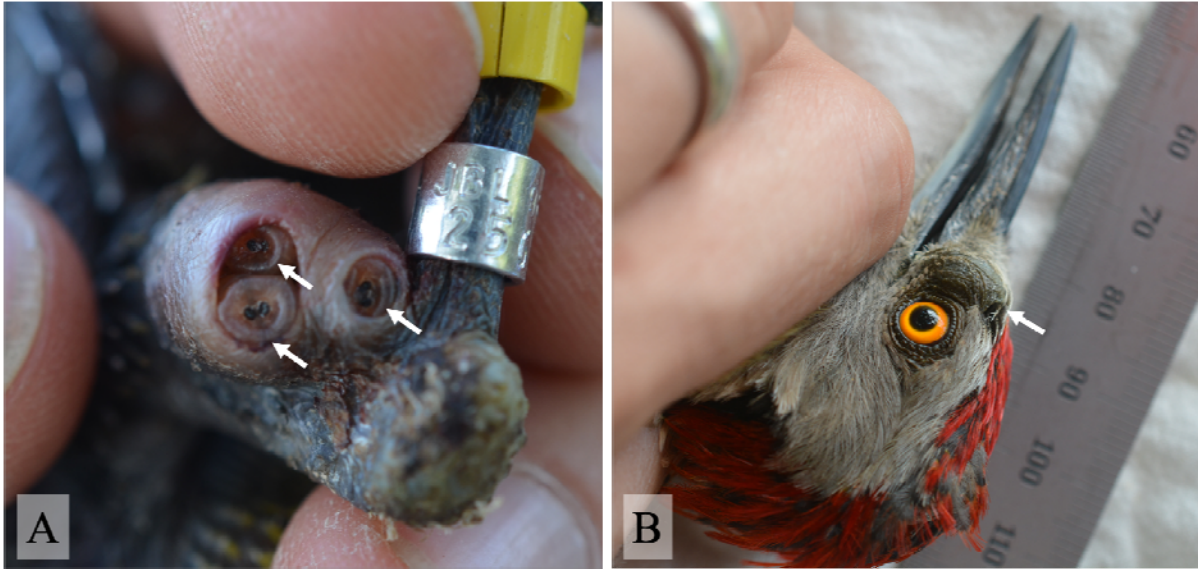

720

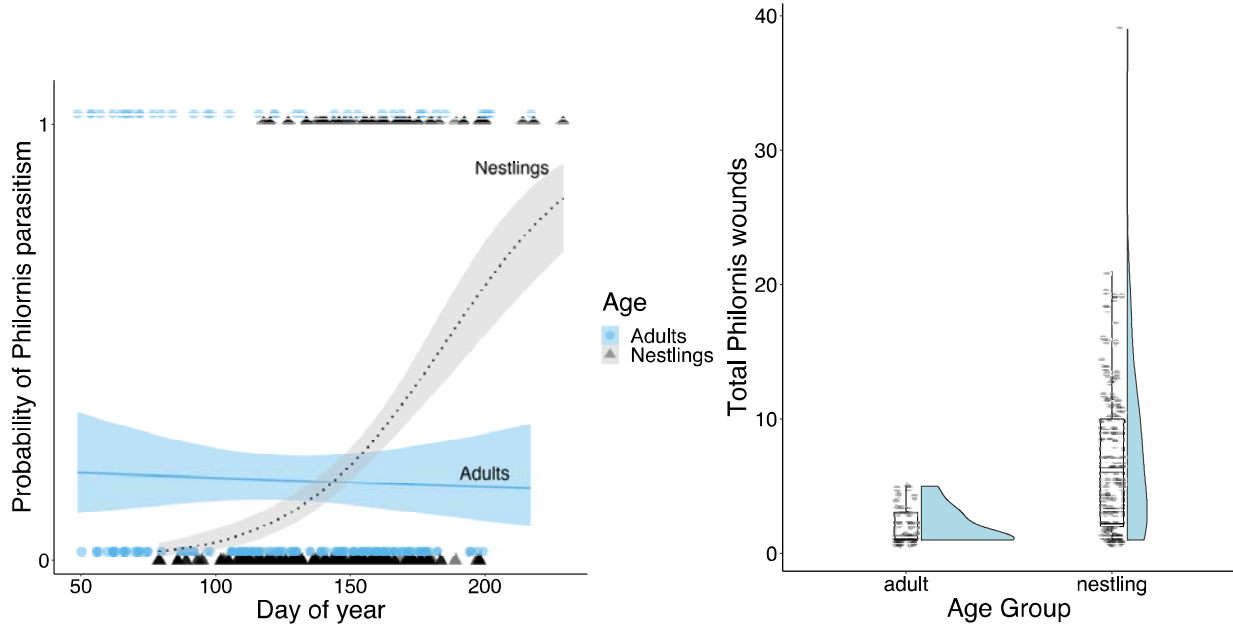

721

722

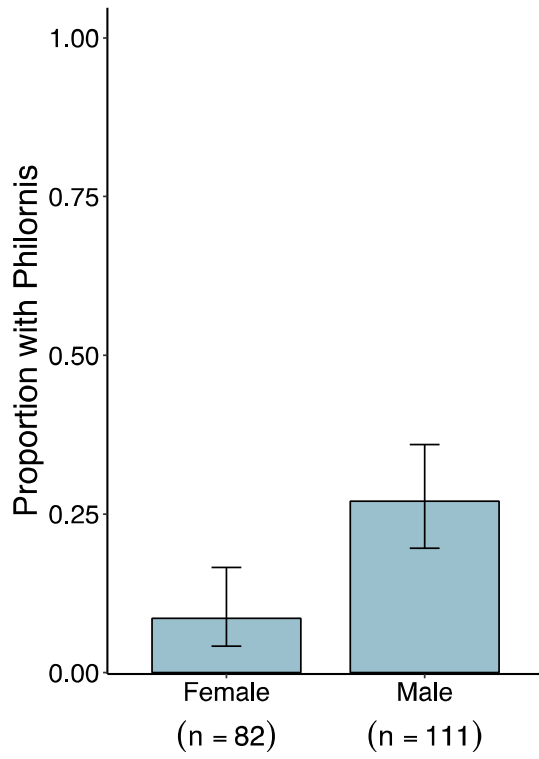

723
